# Supplementary material
Source: Copernicus journal article supplement (doi:10.5194/egqsj-18-104-1967)
Supplement: Supplementary file 1 [file egqsj-18-104-1967-supplement.pdf]

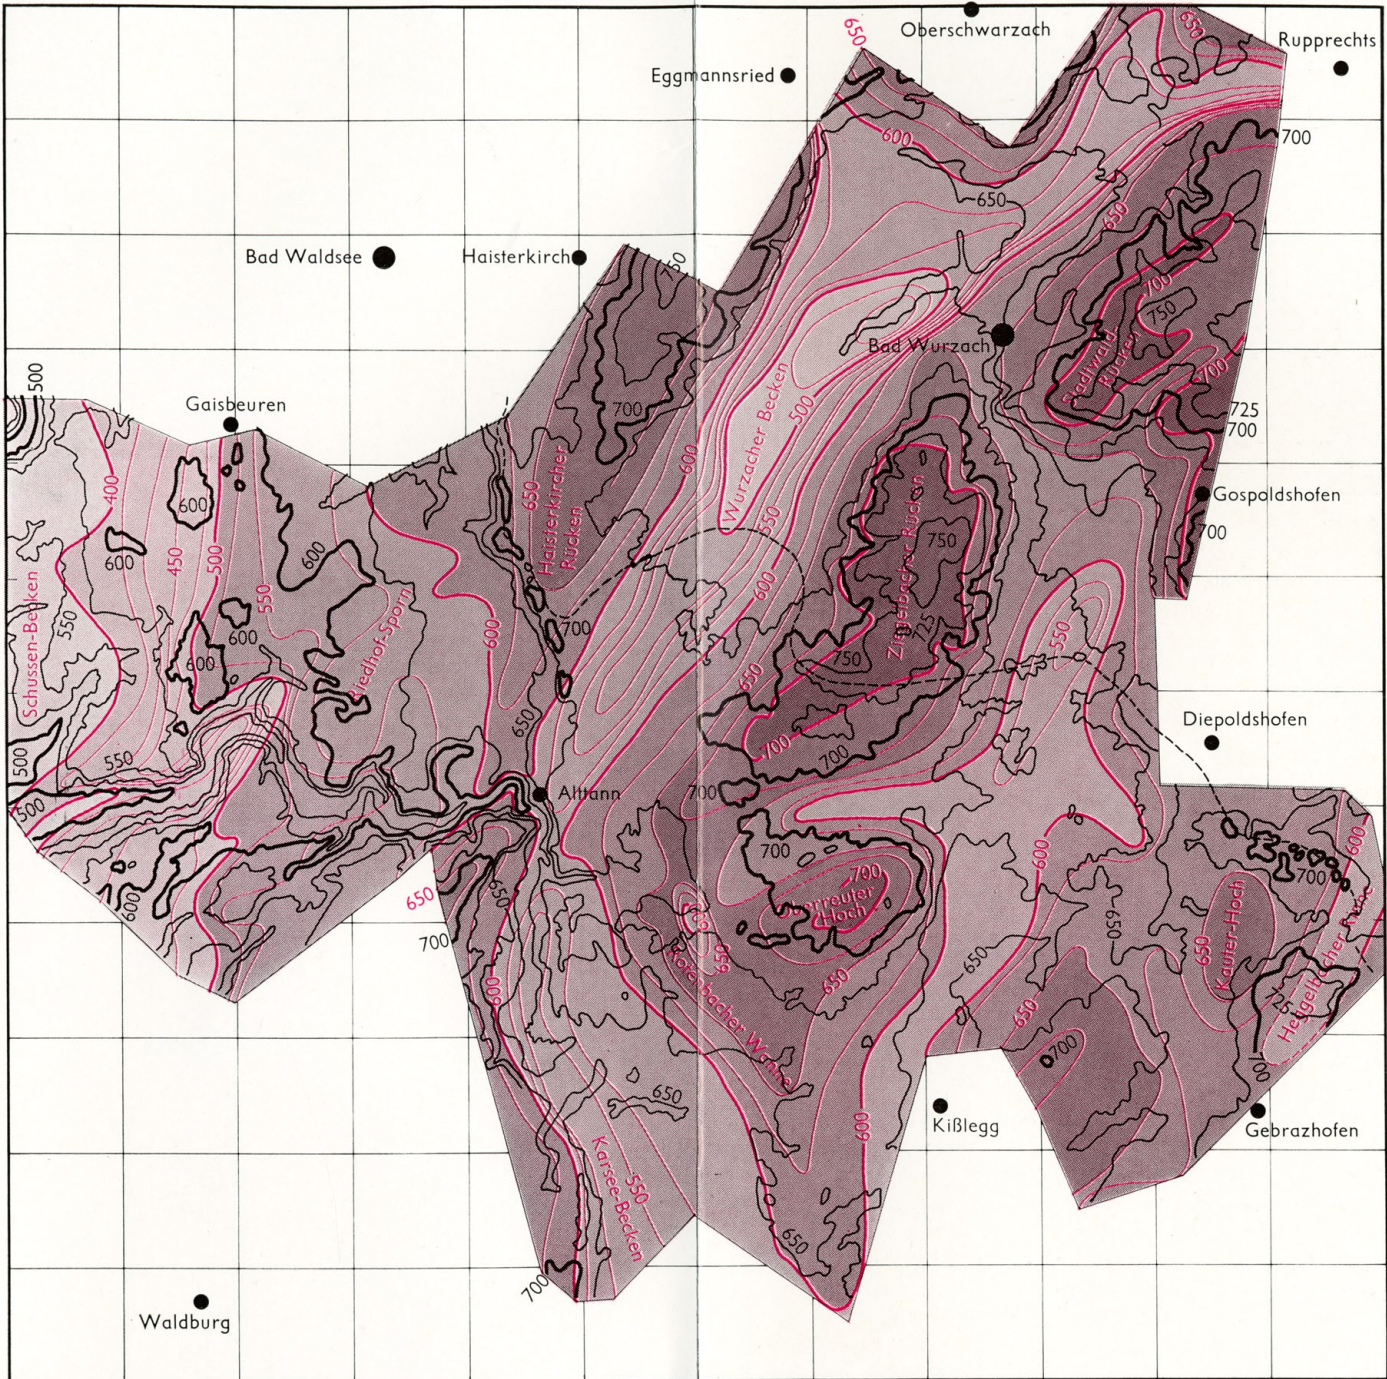

*Höhenlage der Tertiär/Quartär-Grenze im mittleren Oberschwaben (rot) und der heutigen Erdoberfläche (schwarz).*

Aus: UMSCHAU in Wissenschaft und Technik, Frankfurt a. M. 67 (1967) Heft 9, Seite 275 · Rüdiger German, Neue Wege der Eiszeitforschung im Alpenvorland.
